# Supplementary material
Source: publisher site journal article supplement (https://static.cambridge.org/content/id/urn:cambridge.org:id:article:S1368980020001846/resource/name/S1368980020001846supp001.docx)
Supplement: Supplementary file 1 [file S1368980020001846supp001.docx]

**Supplemental Table 1** HEI-2010 and HEI-2015 Scores (total and component) of NHANES 2005-2016 adults stratified by cannabis use with the simple method and multiple regression mean (SE)*τ

| HEI Component  (Standard Scoring for Maximum Score) | | HEI-2010 Score | | | | HEI-2015 Score | | | |
| --- | --- | --- | --- | --- | --- | --- | --- | --- | --- |
| Maximum Score | Never Used Cannabis  (n=8,216) | Previously Used Cannabis (n=7,127) | Current Cannabis Users  (n=2,510) | Maximum Score | Never Used Cannabis  (n=8,216) | Previously Used Cannabis (n=7,127) | Current Cannabis Users (n=2,510) |
|  | Total HEI Score | 100 | 51.8 (0.3) | 52.2 (0.3) | 52.0 (0.5) | 100 | 52.2 (0.3) | 52.5 (0.3) | 52.8 (0.5) |
| Adequacy | 1. Total Vegetables  (≥ 1.1 cup equivalents per 1000 kcal) | 5 | 3.2 (0.0) a | 3.2 (0.0) a | 3.1 (0.0) b | 5 | 3.2 (0.0) a,b | 3.3 (0.0) a | 3.1 (0.0) b |
| 2. Greens and Beans  (≥ 0.2 cup equivalents per 1000 kcal) | 5 | 1.7 (0.0) | 1.8 (0.0) | 1.8 (0.1) | 5 | 1.9 (0.0) | 2.0 (0.0) | 2.1 (0.1) |
| 3. Total Fruit  (≥ 0.8 cup equivalents per 1000 kcal) | 5 | 2.3 (0.0) | 2.1 (0.0) | 2.2 (0.1) | 5 | 2.3 (0.0) | 2.1 (0.0) | 2.2 (0.1) |
| 4. Whole Fruit  (≥ 0.4 cup equivalents per 1000 kcal) | 5 | 2.3 (0.1) | 2.3 (0.0) | 2.2 (0.1) | 5 | 2.3 (0.0) | 2.3 (0.0) | 2.2 (0.1) |
| 5. Whole Grains  (≥ 1.5 oz equivalents per 1000 kcal) | 10 | 2.6 (0.1) | 2.6 (0.0) | 2.5 (0.1) | 10 | 2.6 (0.1) | 2.6 (0.1) | 2.5 (0.1) |
| 6. Dairy  (≥ 1.3 cup equivalents per 1000 kcal) | 10 | 5.4 (0.1) | 5.5 (0.1) | 5.6 (0.1) | 10 | 5.4 (0.1) | 5.5 (0.1) | 5.6 (0.1) |
| 7. Total Protein Foods  (≥ 2.5 oz equivalents per 1000 kcal) | 5 | 4.5 (0.0) | 4.5 (0.0) | 4.4 (0.0) | 5 | 4.5 (0.0) | 4.5 (0.0) | 4.4 (0.0) |
| 8. Seafood and Plant Protein  (≥ 0.8 oz equivalents per 1000 kcal) | 5 | 2.4 (0.1) | 2.6 (0.1) | 2.6 (0.1) | 5 | 2.8 (0.0) | 2.9 (0.0) | 2.9 (0.1) |
| 9. Fatty Acid Ratio  (PUFA+MUFA)/SFAs ≥ 2.5 | 10 | 4.8 (0.1) | 4.9 (0.1) | 4.8 (0.1) | 10 | 4.8 (0.1) | 4.9 (0.1) | 4.8 (0.1) |
| Moderation | 10. Sodium  (≥ 1.1 gram per 1000 kcal) | 10 | 3.8 (0.1) a | 3.7 (0.1) a | 4.2 (0.1) b | 10 | 3.8 (0.1) a | 3.7 (0.1) a | 4.2 (0.1) b |
| 11. Refined Grains  (≥ 1.8 oz equivalents per 1000 kcal) | 10 | 5.9 (0.1) a | 6.3 (0.1) b | 6.4 (0.1) b | 10 | 5.9 (0.1) a | 6.3 (0.1) b | 6.4 (0.1) b |
| 12. SOFAAS  ≤19% of energy | 20 | 12.9 (0.1) | 12.8 (0.1) | 12.4 (0.2) | - | - | - | - |
| 13. Saturated Fat  ≤8% of energy | - | - | - | - | 10 | 6.0 (0.1) | 5.9 (0.1) | 6.1 (0.11) |
| 14. Added Sugar  ≤ 6.5% of energy | - | - | - | - | 10 | 6.6 (0.1) | 6.6 (0.1) | 6.4 (0.1) |

*Adjusted for age (as a continuous variable), gender, poverty to income ratio (as a continuous variable), ethnicity, education level, alcohol (g), smoking current flag

τ Means with different superscripts are significantly different using Bonferonni adjusted p-value of <0.017, as assessed by t-tests
